# Supplementary material for: Motivation for COVID-19 Vaccination in Priority Occupational Groups: A Cross-Sectional Survey
Source: MDPI journal article supplement (doi:10.3390/ijerph182111726), 2021-11-08
Supplement: s1 [file s1]

## Motivation to COVID-19 vaccination in priority occupational groups: a cross-sectional survey

### – the questionnaire

Sex:

- ☐ male
- ☐ female

Age (years): ...

To which occupational group with priority access to vaccination against COVID-19 do you belong?

- ☐ social services
- ☐ security forces
- ☐ healthcare workers
- ☐ critical infrastructure
- ☐ school employees
- ☐ other:

What is your highest reached education??

- ☐ primary
- ☐ lower secondary
- ☐ upper secondary
- ☐ tertiary/university
- ☐ other:

Is your job position mostly managerial?

- ☐ yes
- ☐ no

Are you in contact with a large number of any persons for most of your time at work?

- ☐ yes
- ☐ no

How many colleagues are you in close contact with during the performance of your profession? ...

Do you suffer from a chronic disease?

- ☐ yes
- ☐ no

If you suffer from a chronic disease, what is it?

- ☐ cardiovascular disease
- ☐ arterial hypertension
- ☐ kidney disease
- ☐ liver disease
- ☐ respiratory tract disease
- ☐ immune system disease
- ☐ diabetes mellitus
- ☐ endocrine system disease
- ☐ anaemia
- ☐ other:

Have you undergone COVID-19?

- ☐ yes

- no

Try to assess your overall fear of COVID-19 (its course, consequences...) on a scale of 1-5:

1 – I am not afraid of COVID-19; 5 – I have serious concerns about COVID-19

I was motivated to get vaccinated against COVID-19 by (choose any number of options):

- Concerns about COVID-19 itself
- An effort to prevent the spread of COVID-19 during the performance of my profession
- An effort to protect family members
- Being exempted from restrictive COVID-19 measures after vaccination
- Other:

I was motivated to get vaccinated against COVID-19 by (choose one option/the strongest motive):

- Concerns about COVID-19 itself
- **An effort to prevent the spread of COVID-19 during the performance of my profession**
- An effort to protect family members
- Being exempted from restrictive COVID-19 measures after vaccination
- Other:

***For those, who chose the option highlighted in bold***

In terms of the effort to prevent the spread of COVID-19 in the profession, I was motivated by (choose any number of detailed options):

- An effort to prevent the spread of COVID-19 to people who I work with (clients, patients, etc.)
- An effort to prevent the spread of COVID-19 to colleagues
- An effort not to endanger the functioning of my workplace in case of my incapacity to work
- Being a positive role model for unvaccinated colleagues
- An effort to prevent a negative impact of the disease on my professional development
- Other:
